# Supplementary material for: Burchellin and its stereoisomers: total synthesis, structural elucidation and antiviral activity
Source: Royal Society of Chemistry journal article supplement (doi:10.1039/d0ob01889a), 2020-01-01

## Electronic Supplementary Information

# Burchellin and its stereoisomers: total synthesis, structural elucidation and antiviral activity

Rubing Wang,<sup>‡,a</sup> Xiaodong Ren,<sup>‡,b</sup> Jie He,<sup>a</sup> Shanshan Zhu,<sup>a</sup> Hui-Ru Xie,<sup>a</sup> Guo-Zhu Su,<sup>a</sup> Shuang-Gang Ma<sup>a</sup>  
and Shi-Shan Yu<sup>\*a</sup>

<sup>a</sup>State Key Laboratory of Bioactive Substance and Function of Natural Medicines, Institute of Materia Medica, Chinese Academy of Medical Sciences, Peking Union Medical College, Beijing 100050, China.

<sup>b</sup>Medical College, Guizhou University, Guiyang 550025, China

<sup>#</sup>These authors contributed equally to this article

E-mail: yushishan@imm.ac.cn

$^1\text{H}$  NMR (500 MHz) spectrum of compound **14** in  $\text{CDCl}_3$

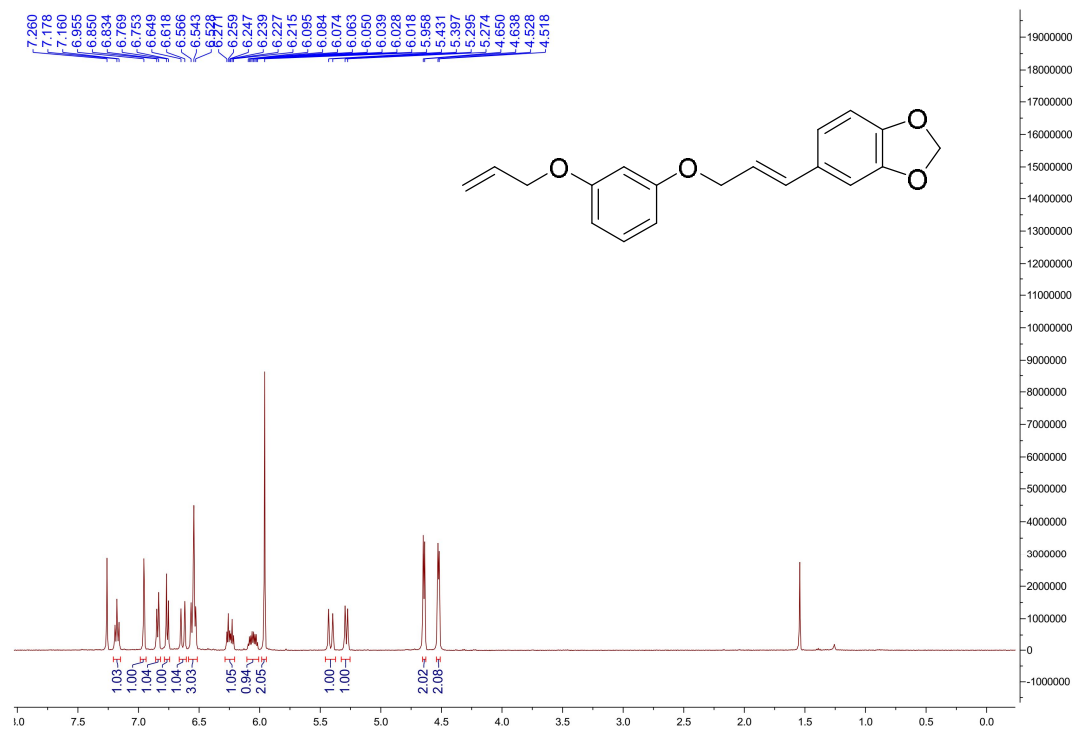

$^{13}\text{C}$  NMR (125 MHz) spectrum of compound **14** in  $\text{CDCl}_3$

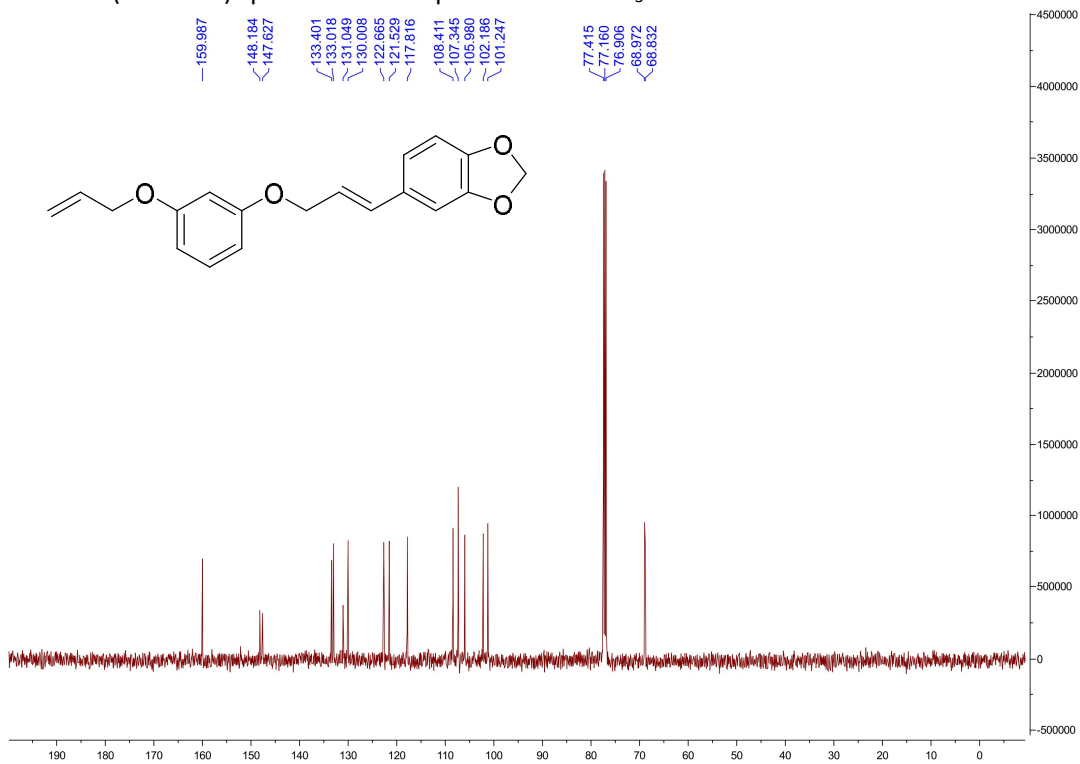

$^1\text{H}$  NMR (500 MHz) spectrum of compound **10** in  $\text{CDCl}_3$

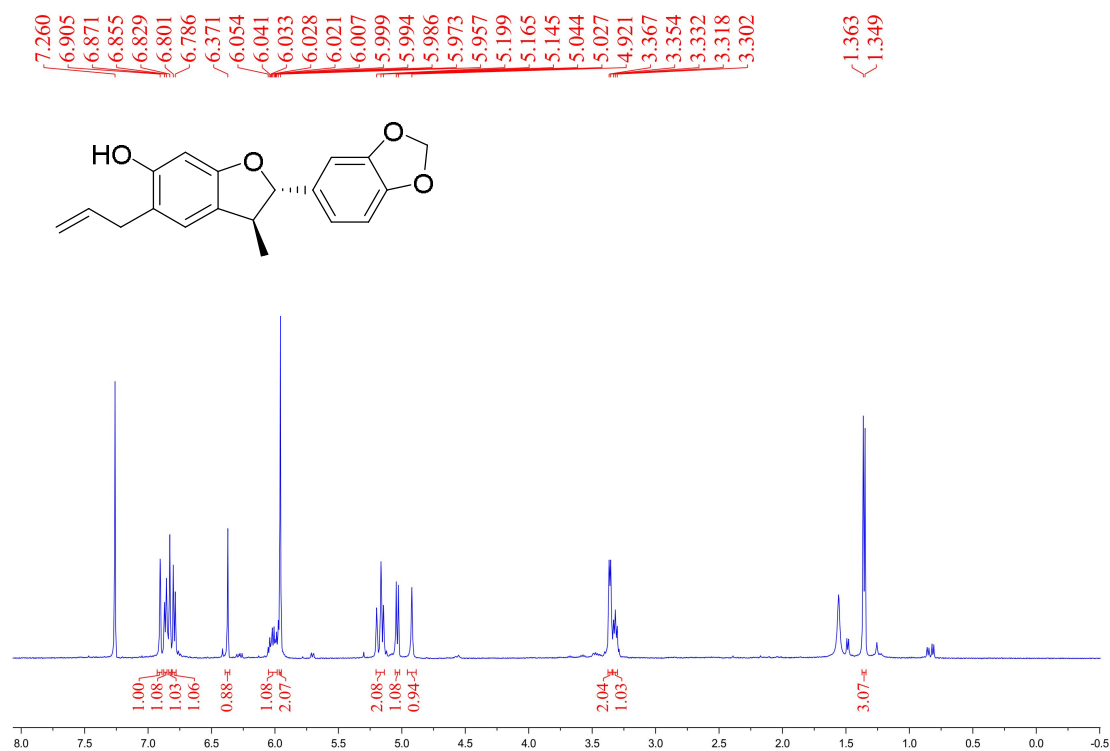

$^{13}\text{C}$  NMR (125 MHz) spectrum of compound **10** in  $\text{CDCl}_3$

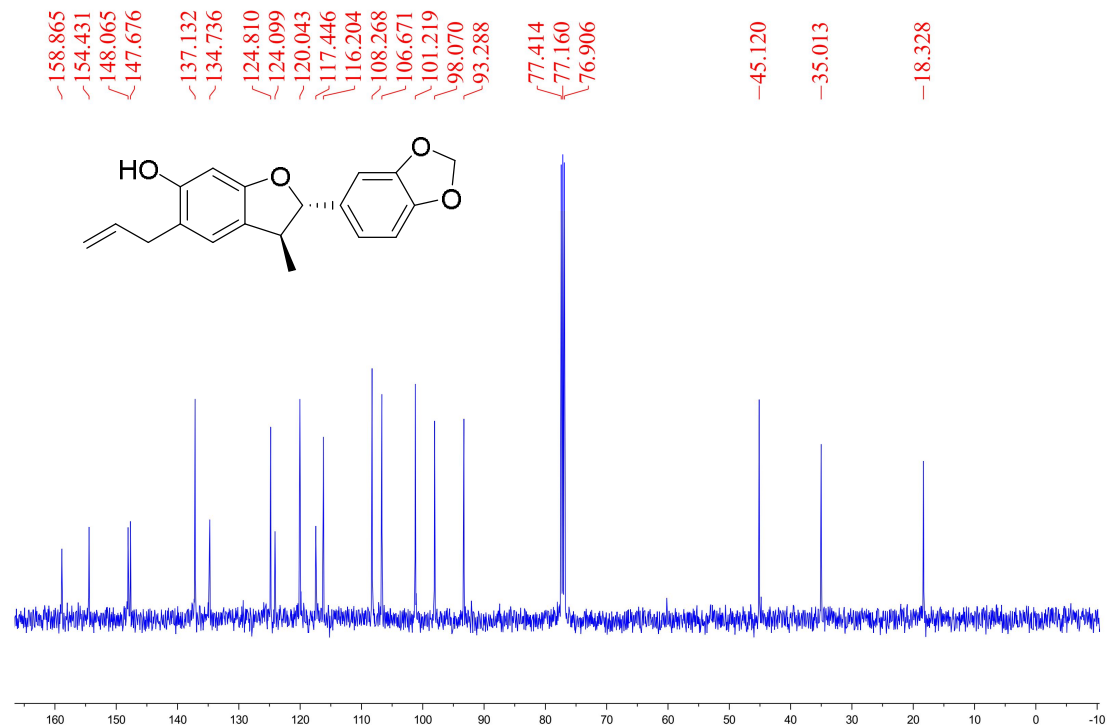

$^1\text{H}$  NMR (500 MHz) spectrum of compound **ent-10** in  $\text{CDCl}_3$

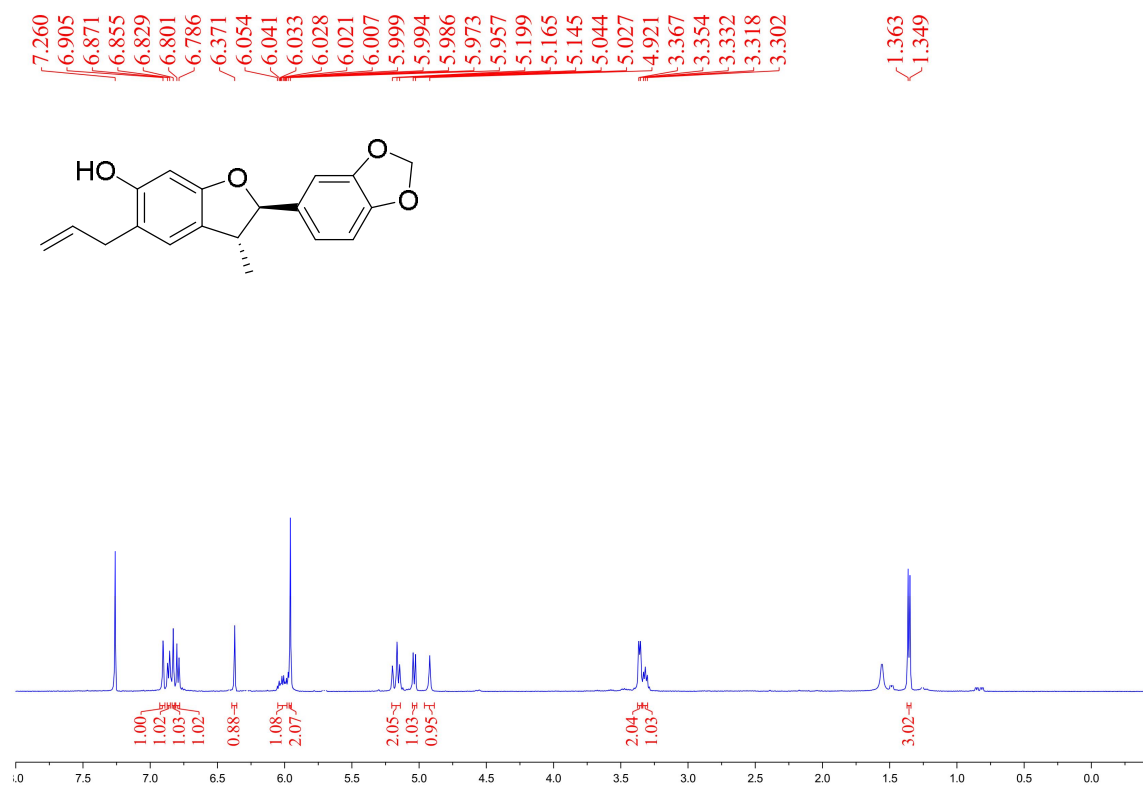

$^{13}\text{C}$  NMR (125 MHz) spectrum of compound **ent-10** in  $\text{CDCl}_3$

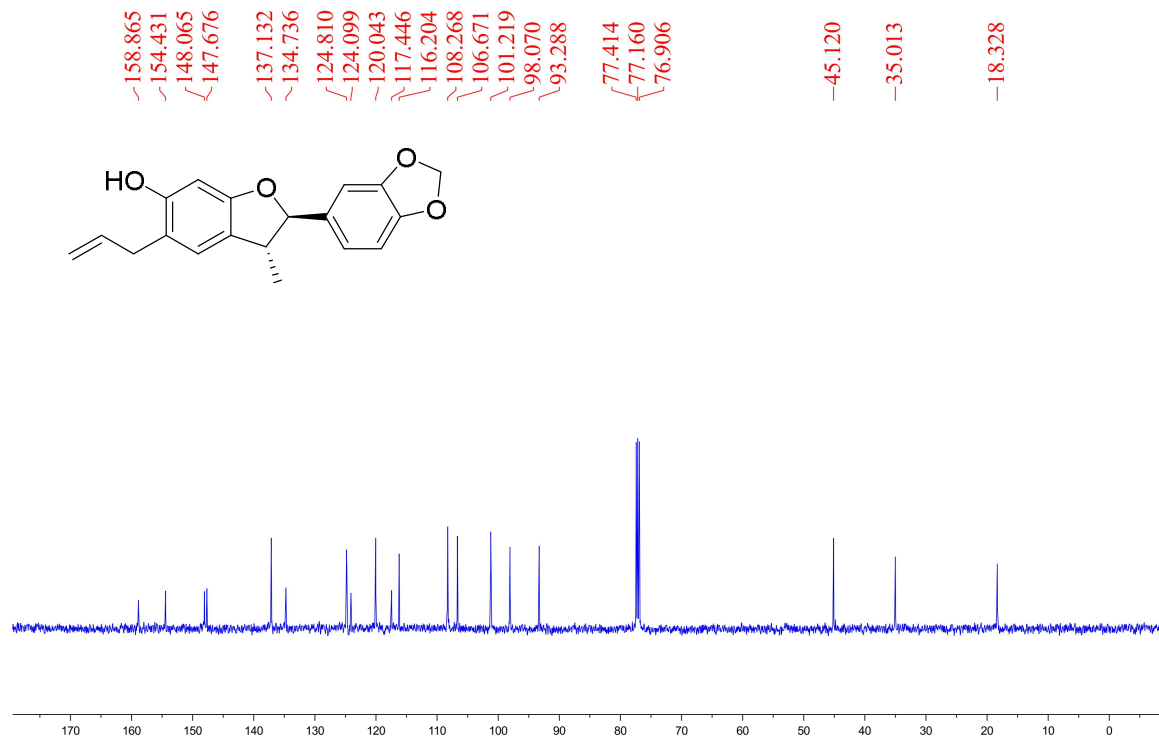

$^1\text{H}$  NMR (800 MHz) spectrum of compound **1a** in  $\text{CDCl}_3$

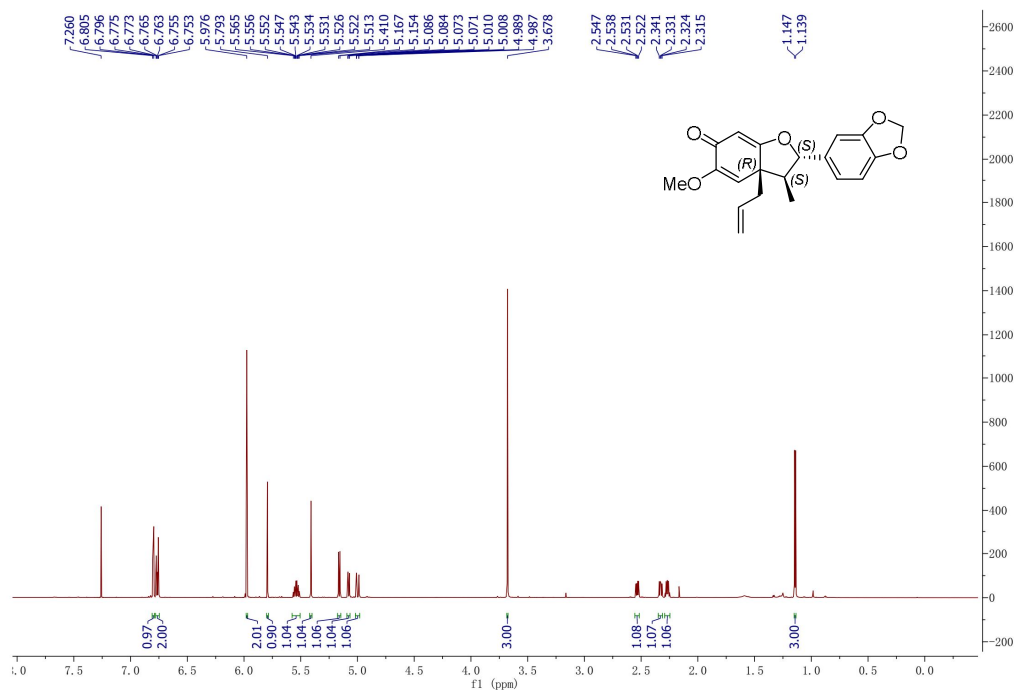

$^{13}\text{C}$  NMR (200 MHz) spectrum of compound **1a** in  $\text{CDCl}_3$

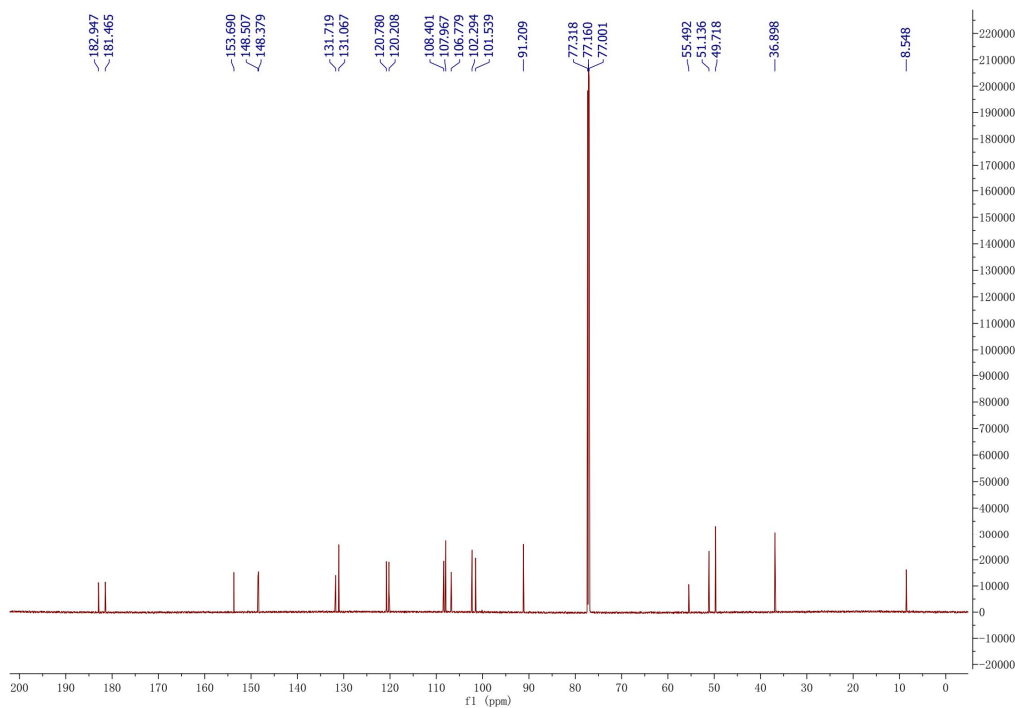

$^1\text{H}$ - $^1\text{H}$  COSY (800 MHz) spectrum of compound **1a** in  $\text{CDCl}_3$

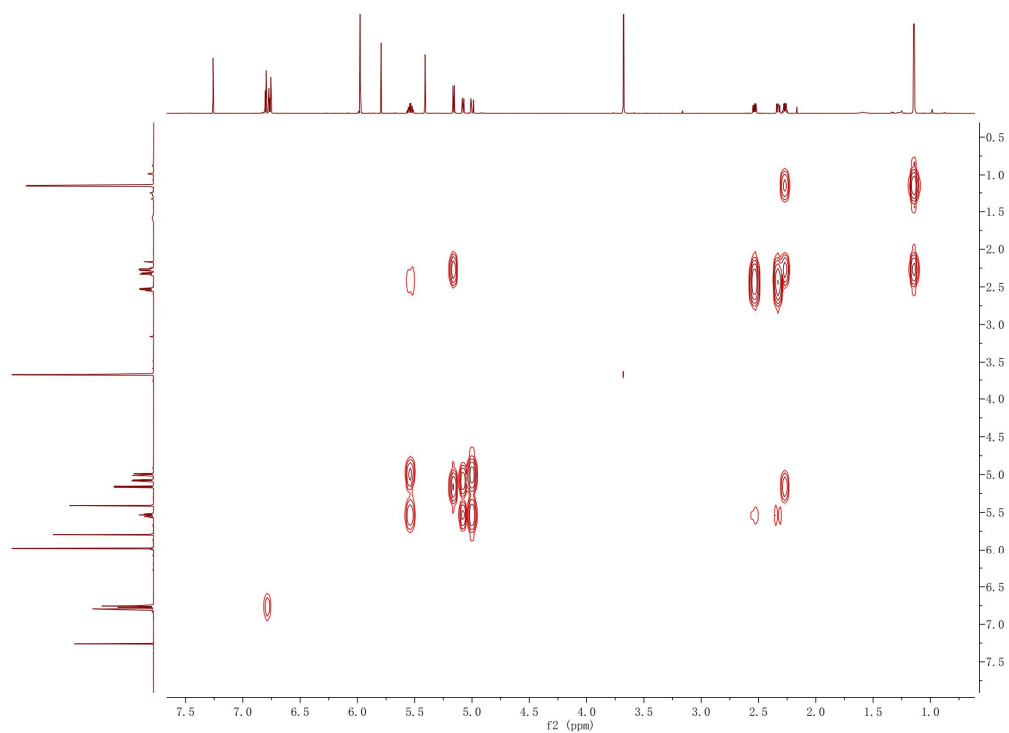

HSQC (800 MHz) spectrum of compound **1a** in  $\text{CDCl}_3$

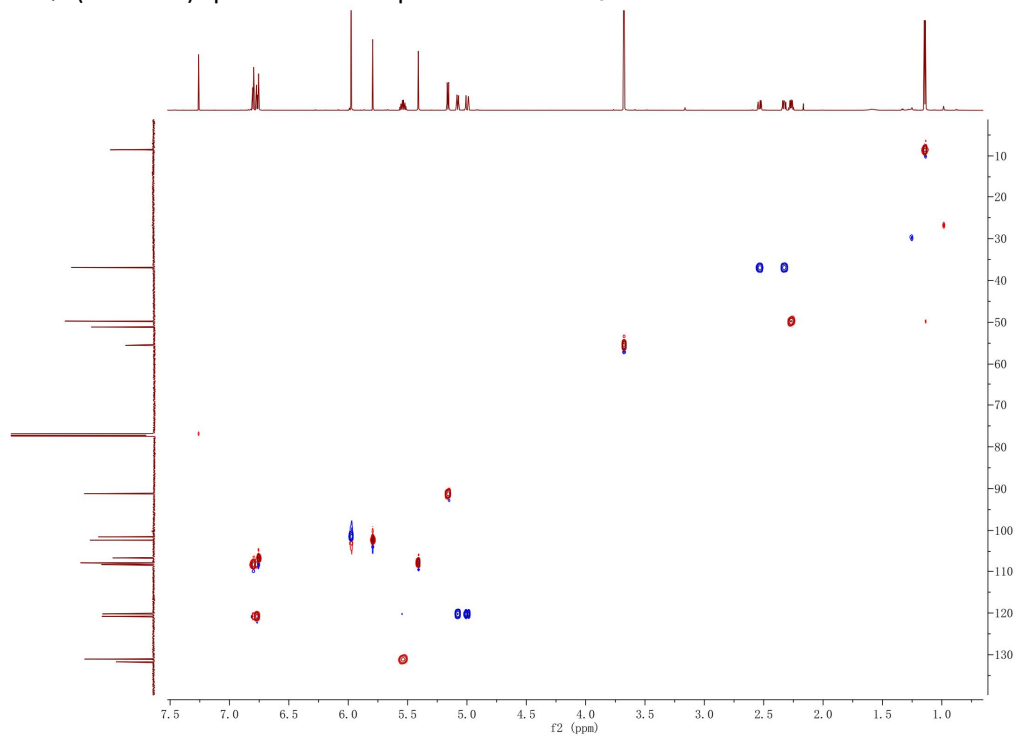

HMBC (800 MHz) spectrum of compound **1a** in CDCl<sub>3</sub>

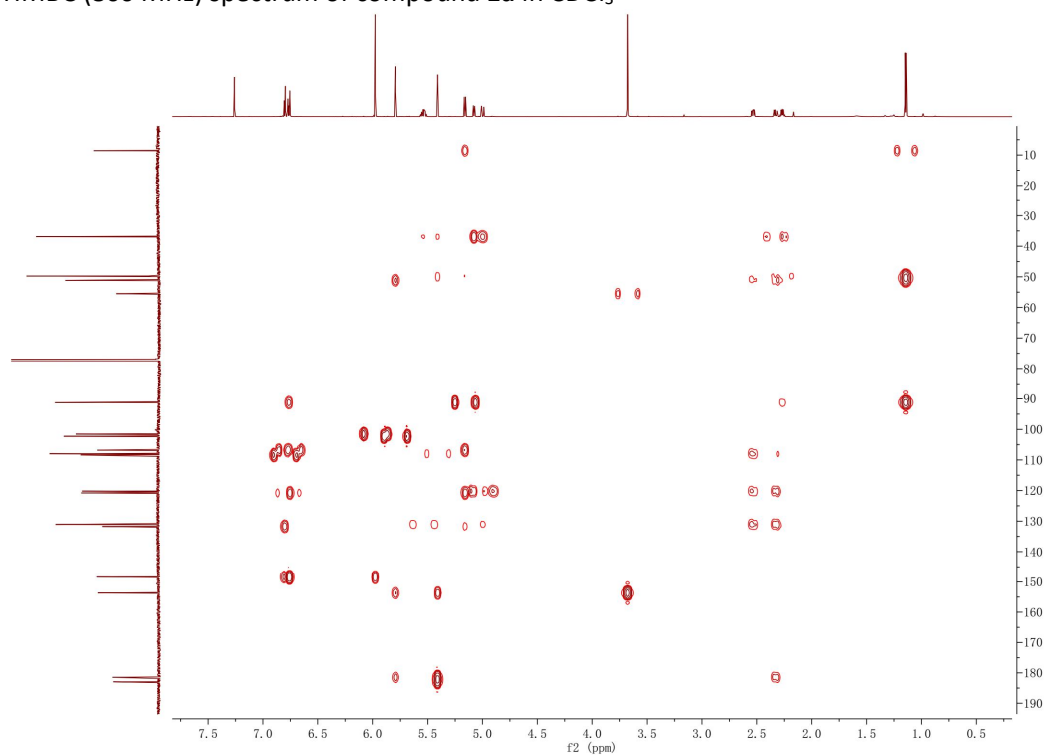

NOESY (800 MHz) spectrum of compound **1a** in CDCl<sub>3</sub>

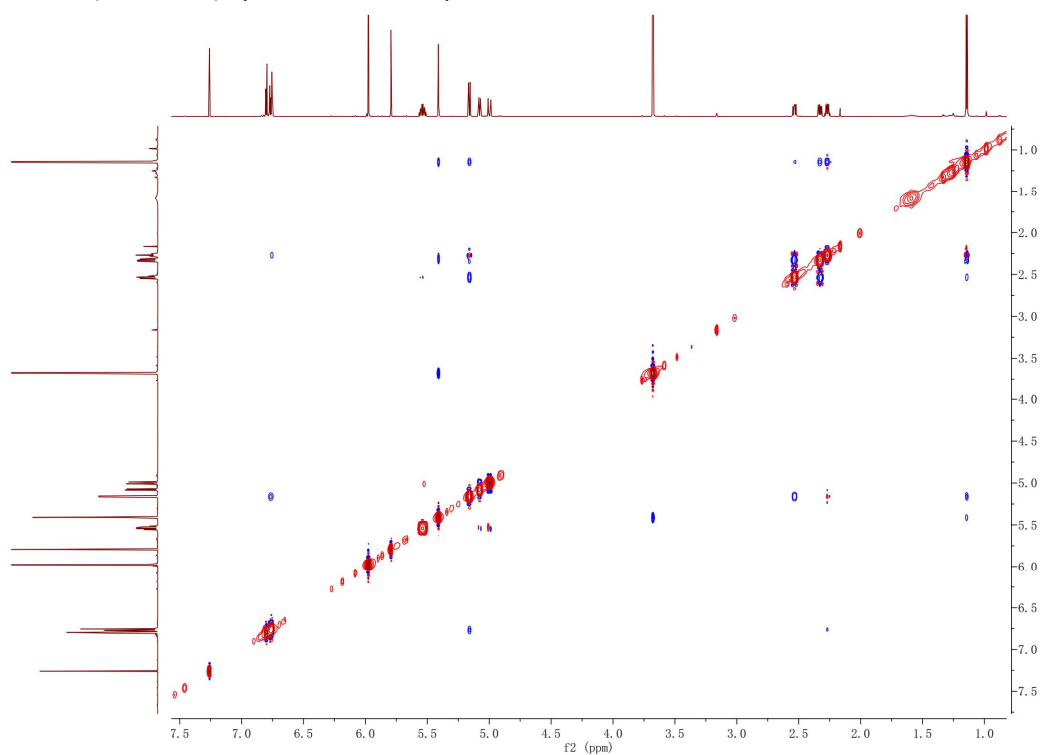

$^1\text{H}$  NMR (800 MHz) spectrum of compound **1b** in  $\text{CDCl}_3$

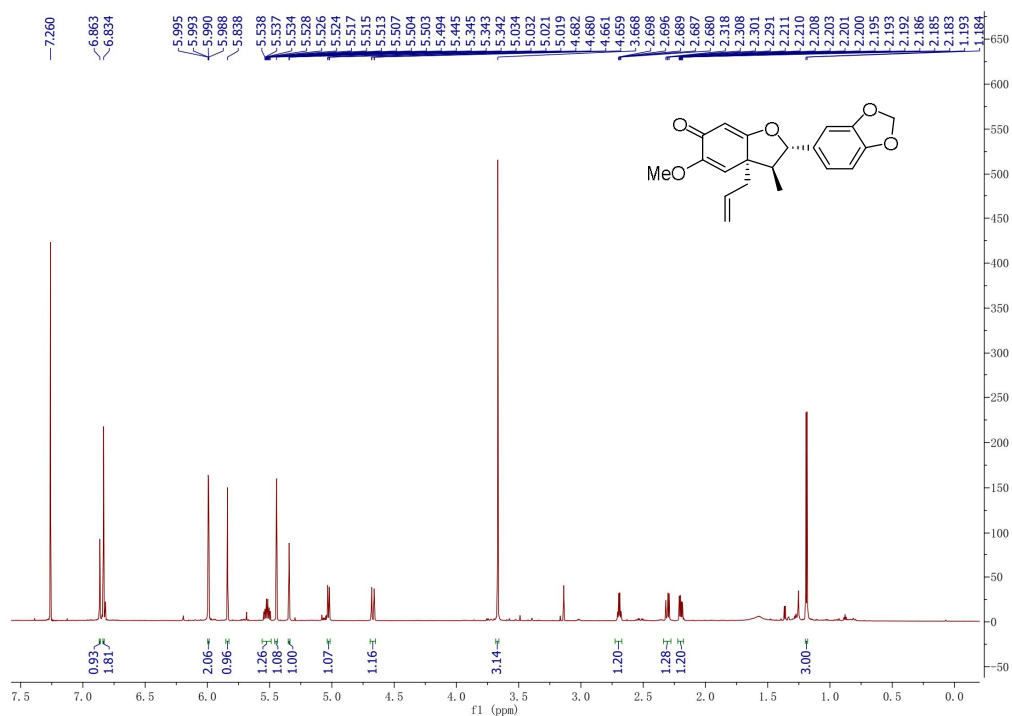



$^1\text{H}$ - $^1\text{H}$  COSY (800 MHz) spectrum of compound **1b** in  $\text{CDCl}_3$

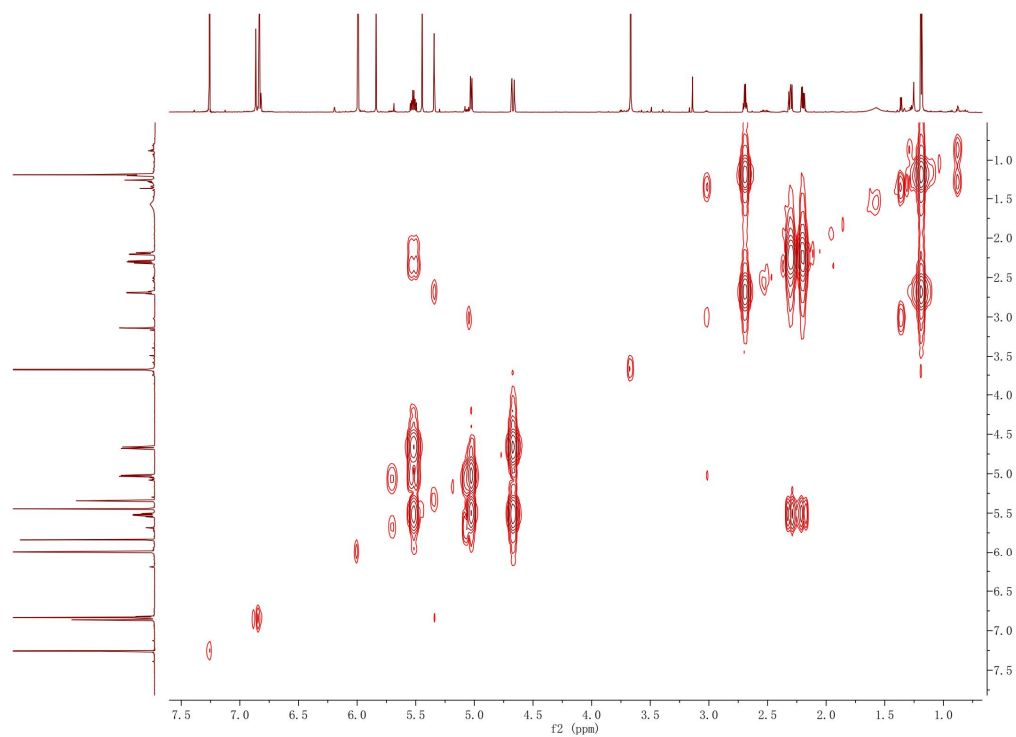

HSQC (800 MHz) spectrum of compound **1b** in  $\text{CDCl}_3$

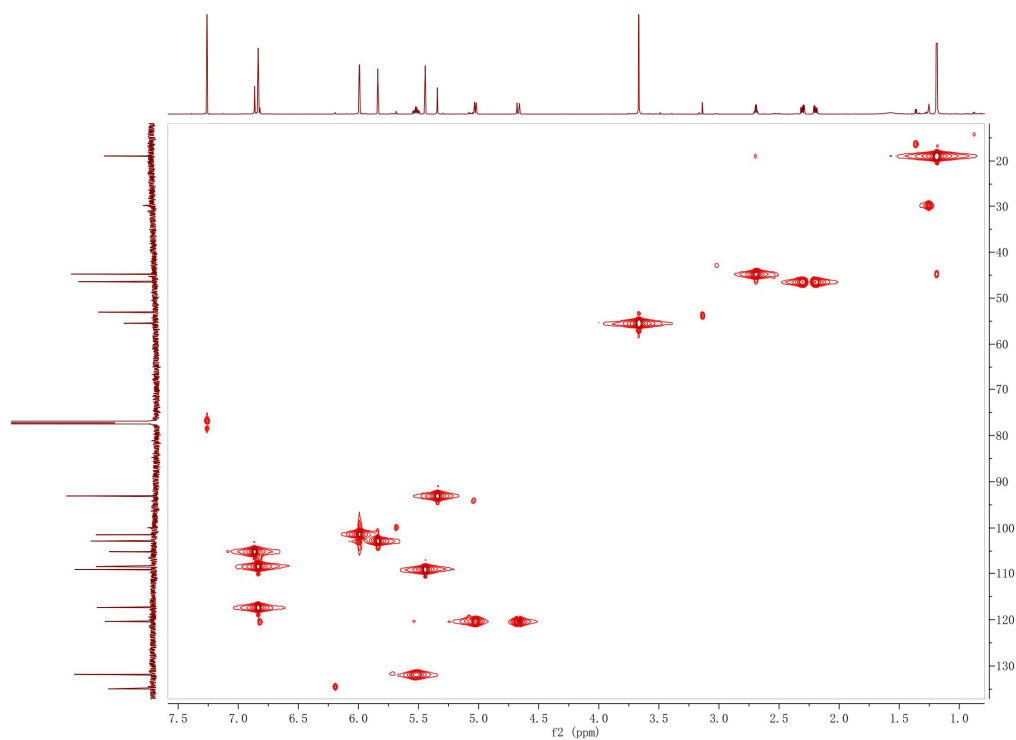

HMBC (800 MHz) spectrum of compound **1b** in CDCl<sub>3</sub>

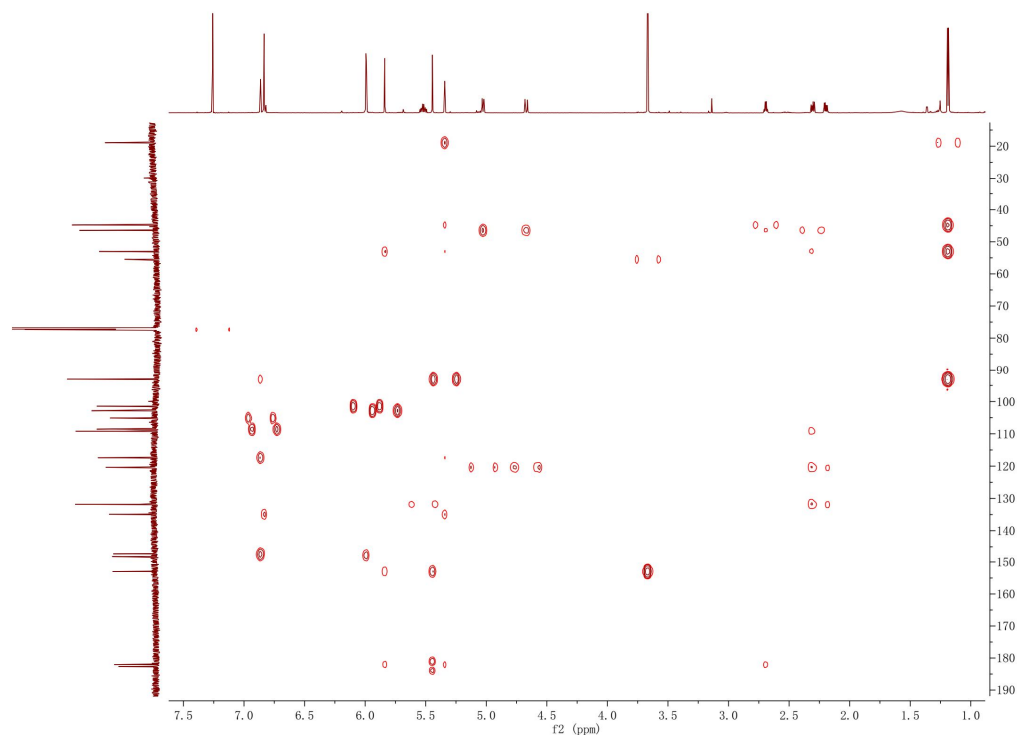

NOESY (800 MHz) spectrum of compound **1b** in CDCl<sub>3</sub>

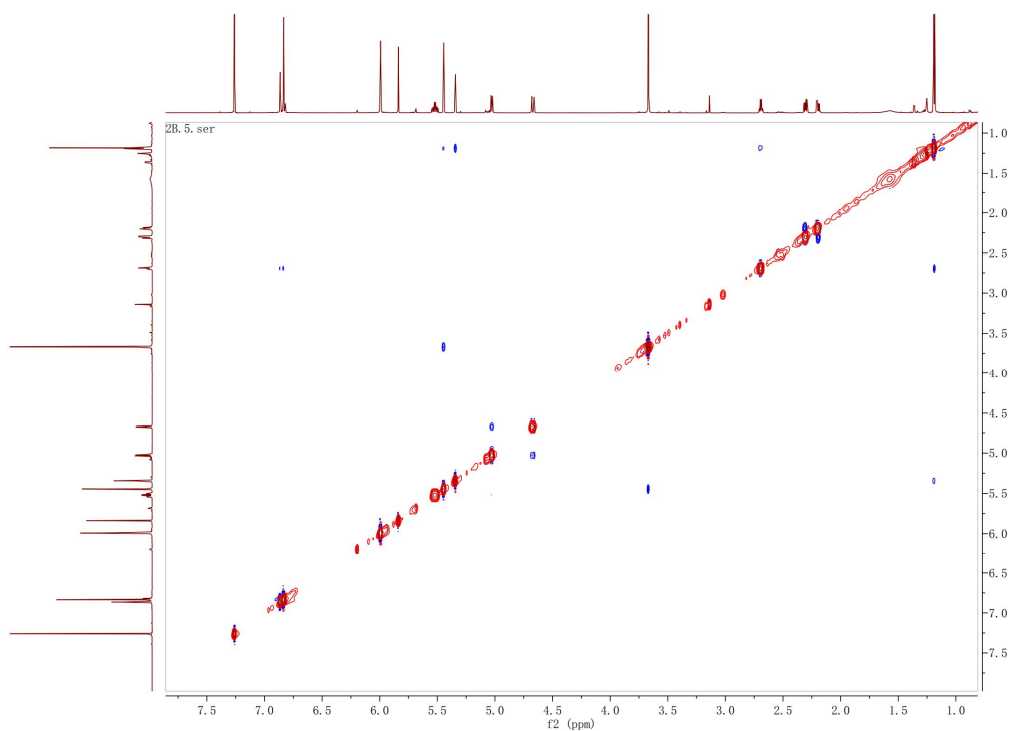

$^1\text{H}$  NMR (800 MHz) spectrum of compound **ent-1b** in  $\text{CDCl}_3$

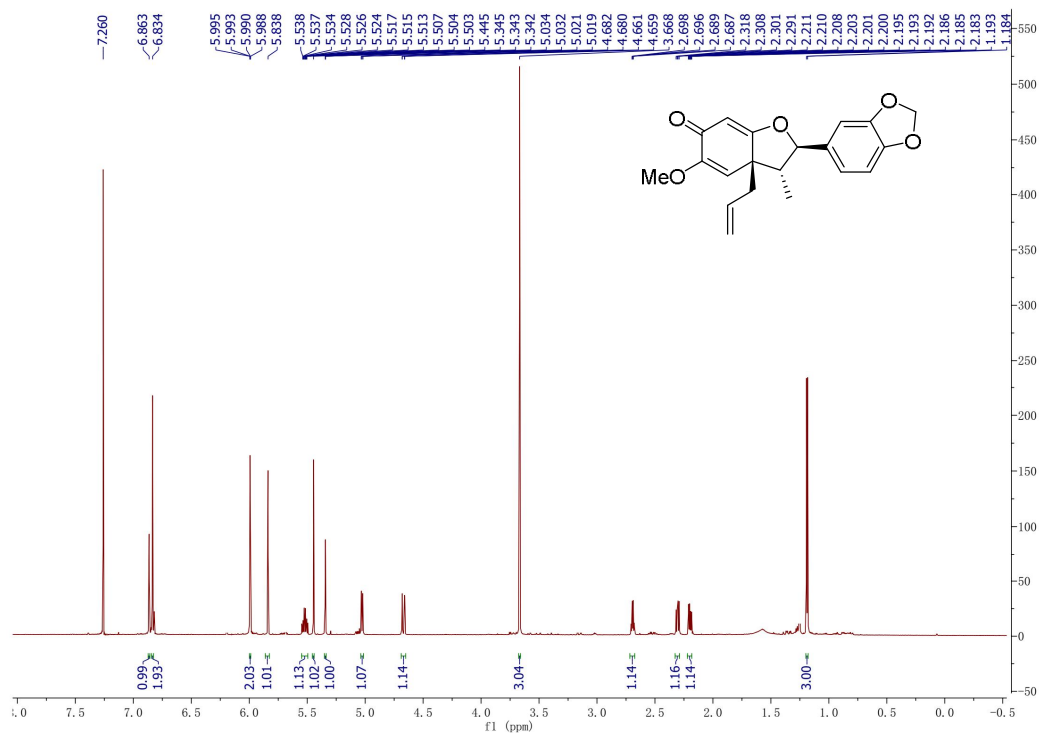

$^{13}\text{C}$  NMR (200 MHz) spectrum of compound **ent-1b** in  $\text{CDCl}_3$

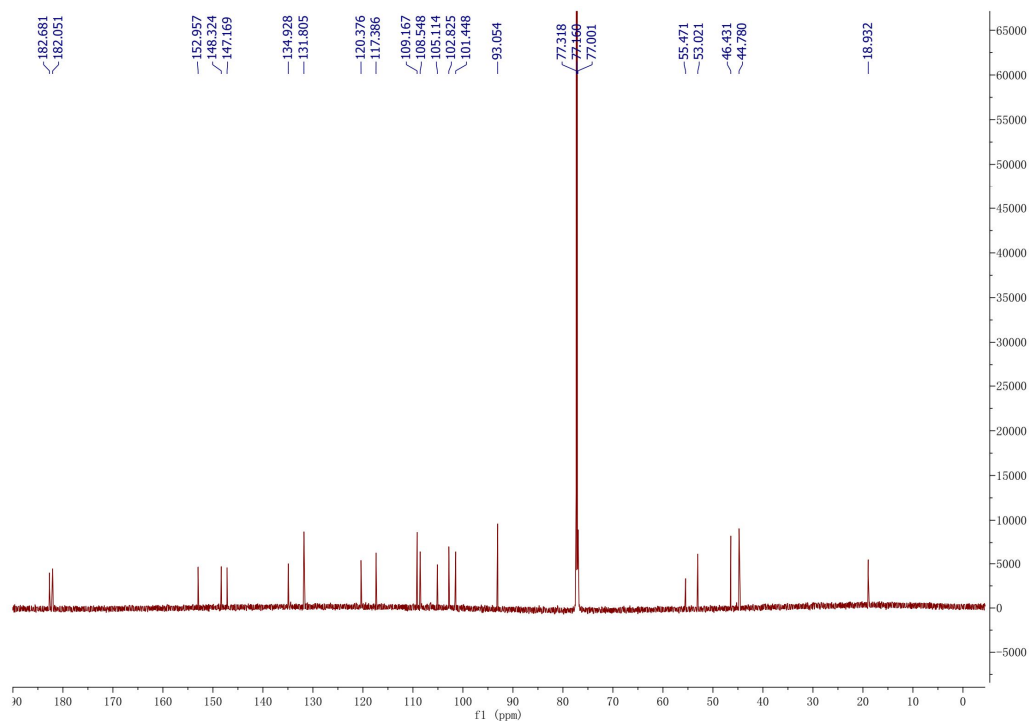

$^1\text{H}$ - $^1\text{H}$  COSY (800 MHz) spectrum of compound **ent-1b** in  $\text{CDCl}_3$

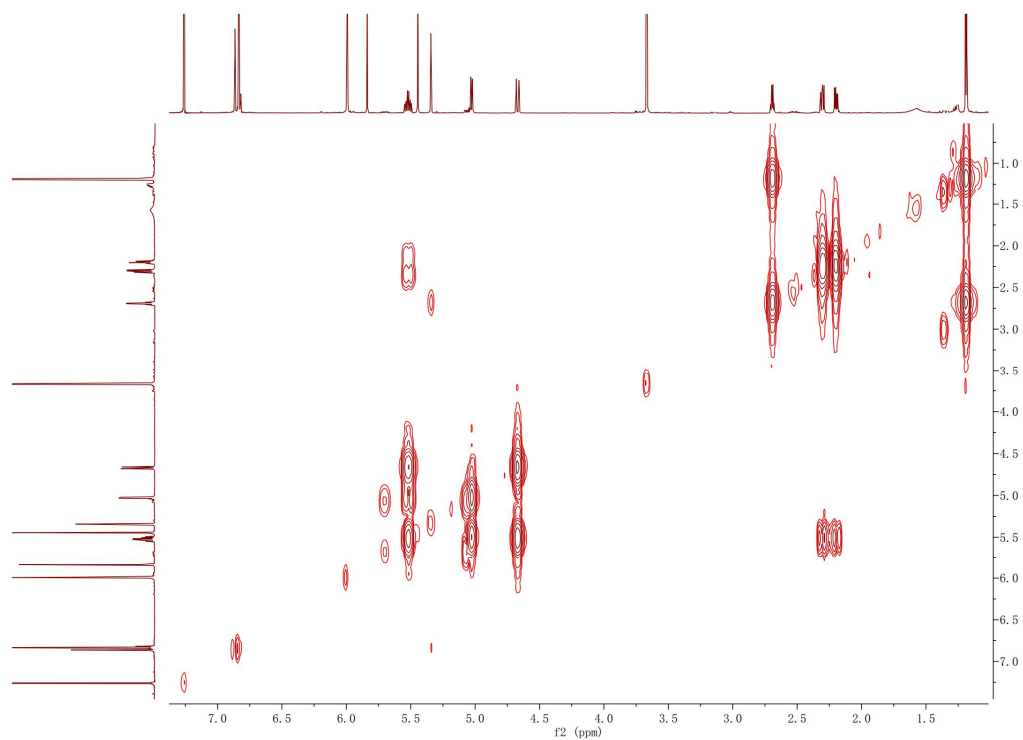

HSQC (800 MHz) spectrum of compound **ent-1b** in  $\text{CDCl}_3$

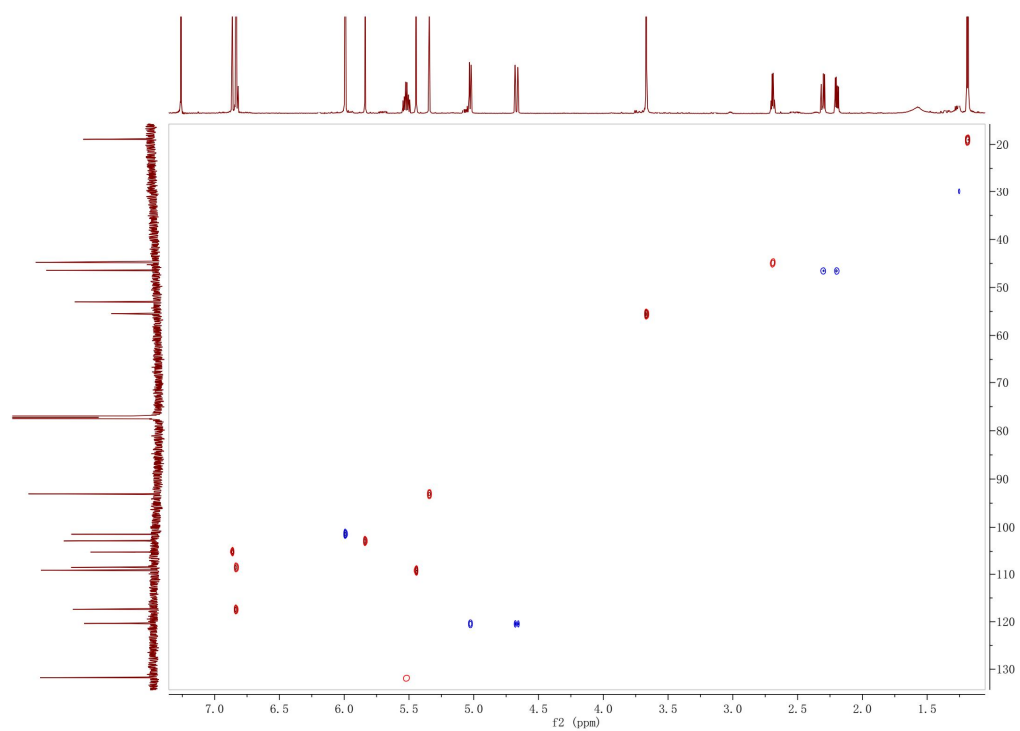

HMBC (800 MHz) spectrum of compound **ent-1b** in CDCl<sub>3</sub>

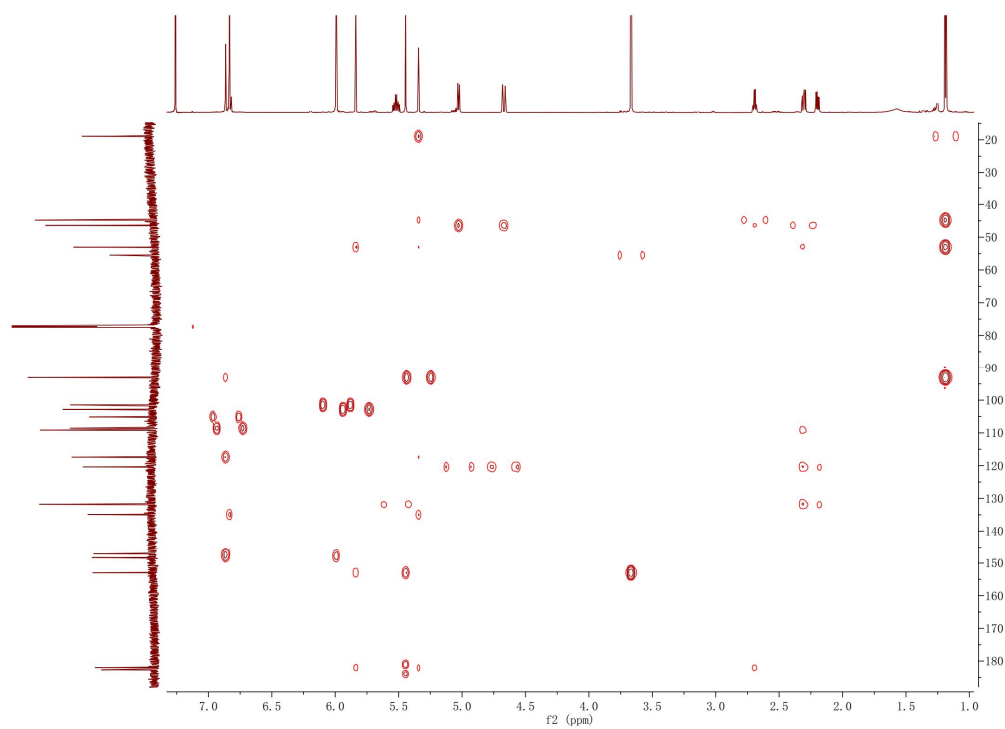

NOESY (800 MHz) spectrum of compound **ent-1b** in CDCl<sub>3</sub>

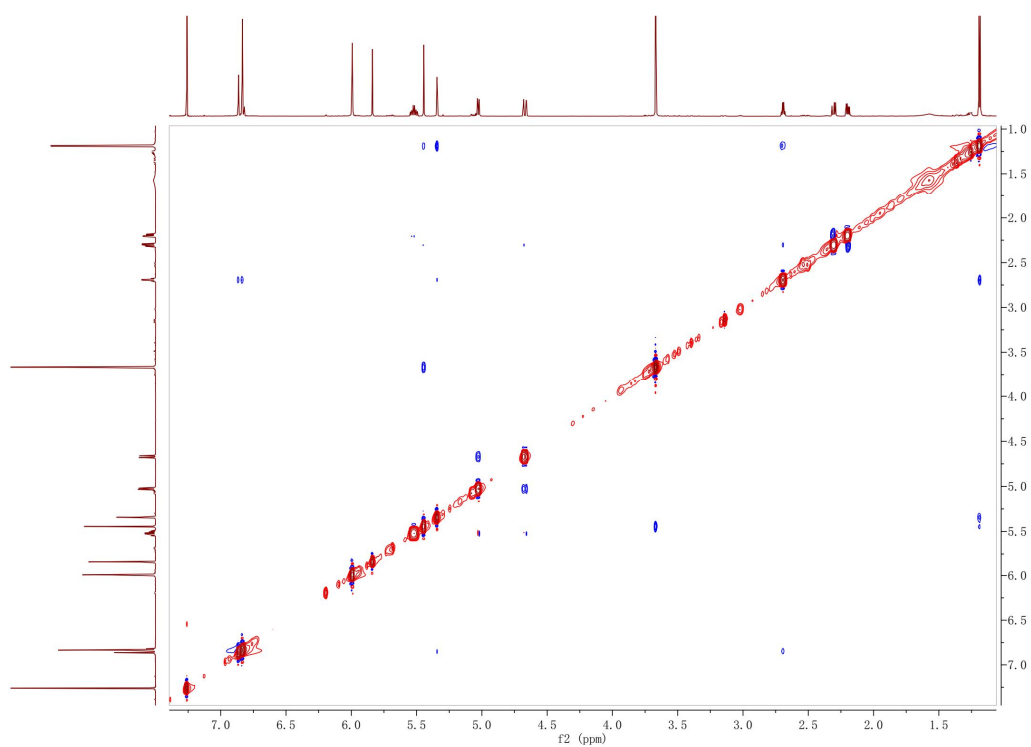

$^1\text{H}$  NMR (800 MHz) spectrum of compound **ent-1a** in  $\text{CDCl}_3$

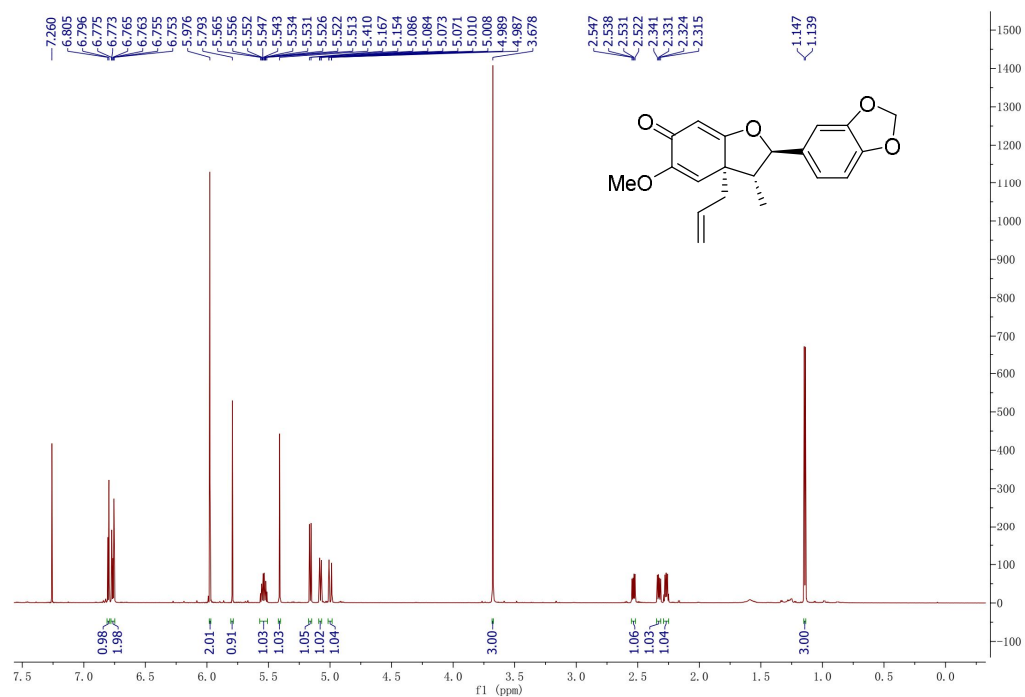

$^{13}\text{C}$  NMR (200 MHz) spectrum of compound **ent-1a** in  $\text{CDCl}_3$

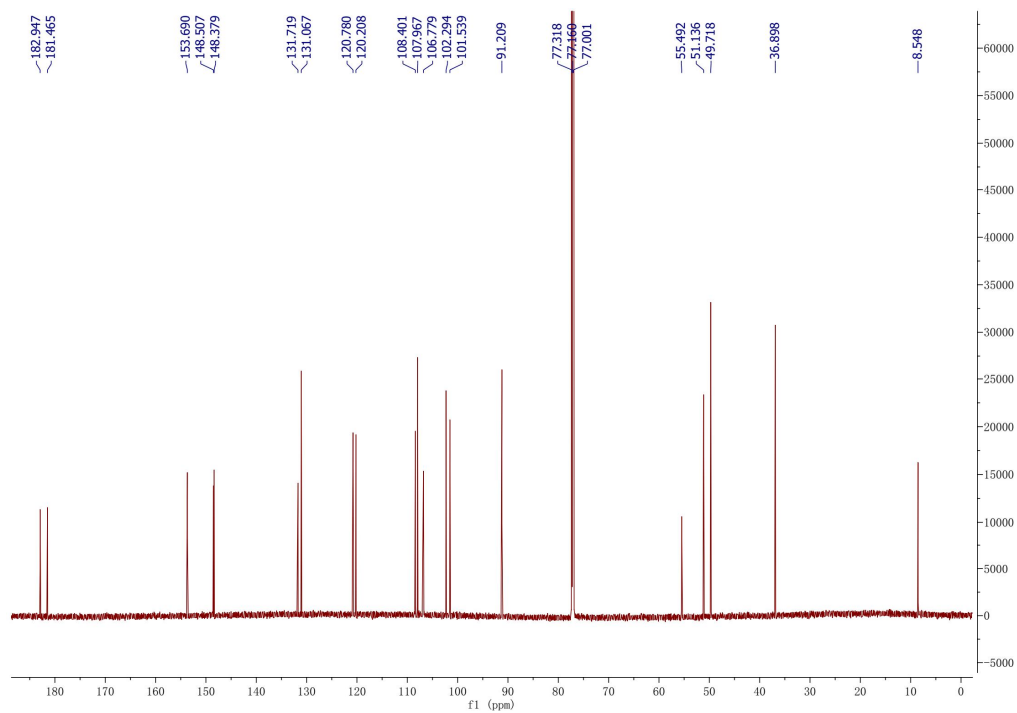

$^1\text{H}$ - $^1\text{H}$  COSY (800 MHz) spectrum of compound **ent-1a** in  $\text{CDCl}_3$

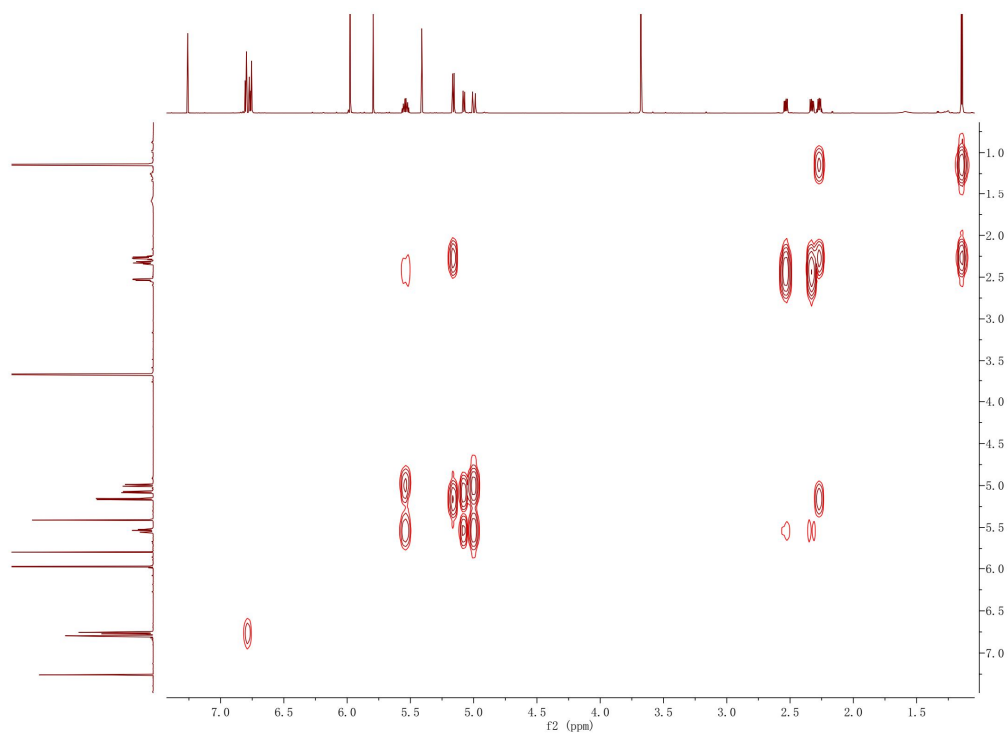

HSQC (800 MHz) spectrum of compound **ent-1a** in  $\text{CDCl}_3$

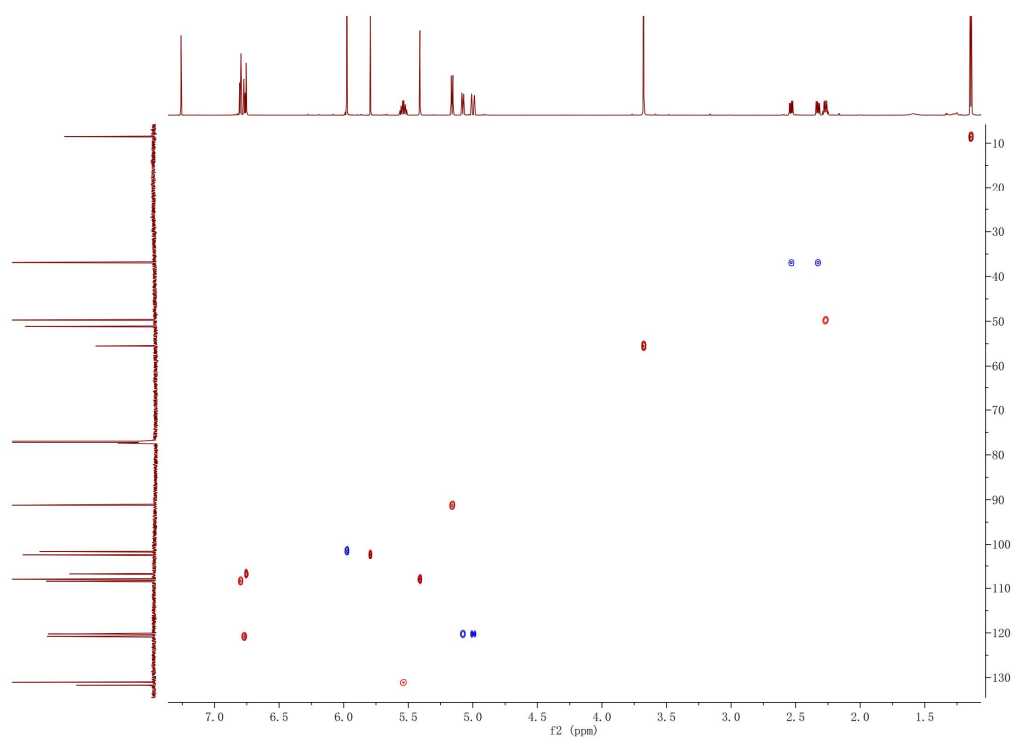

HMBC (800 MHz) spectrum of compound **ent-1a** in CDCl<sub>3</sub>

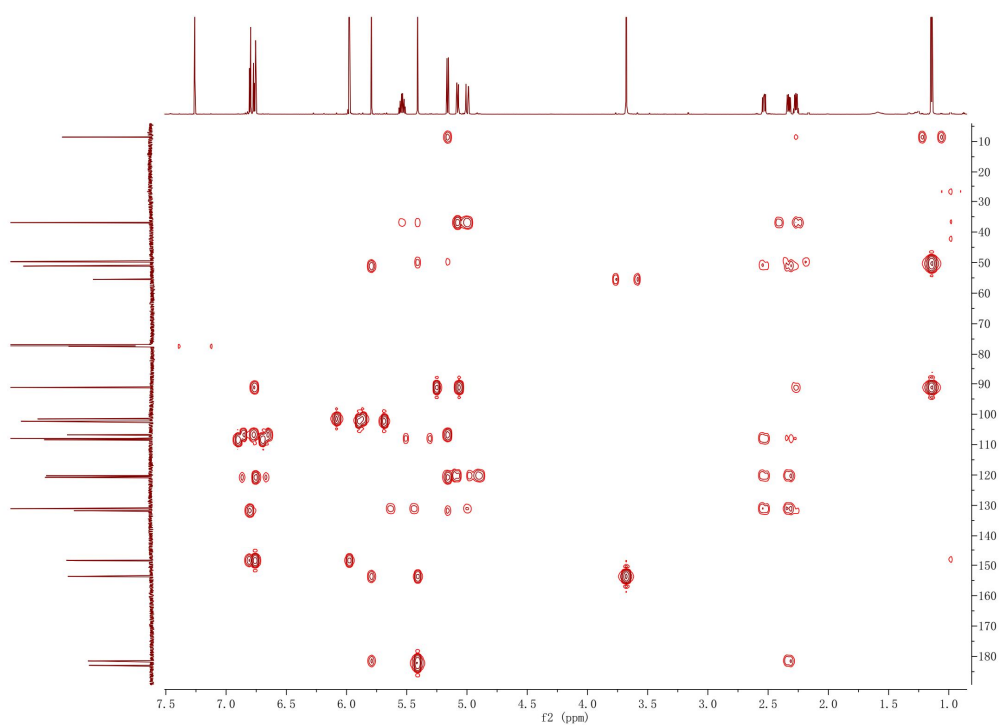

NOESY (800 MHz) spectrum of compound **ent-1a** in CDCl<sub>3</sub>

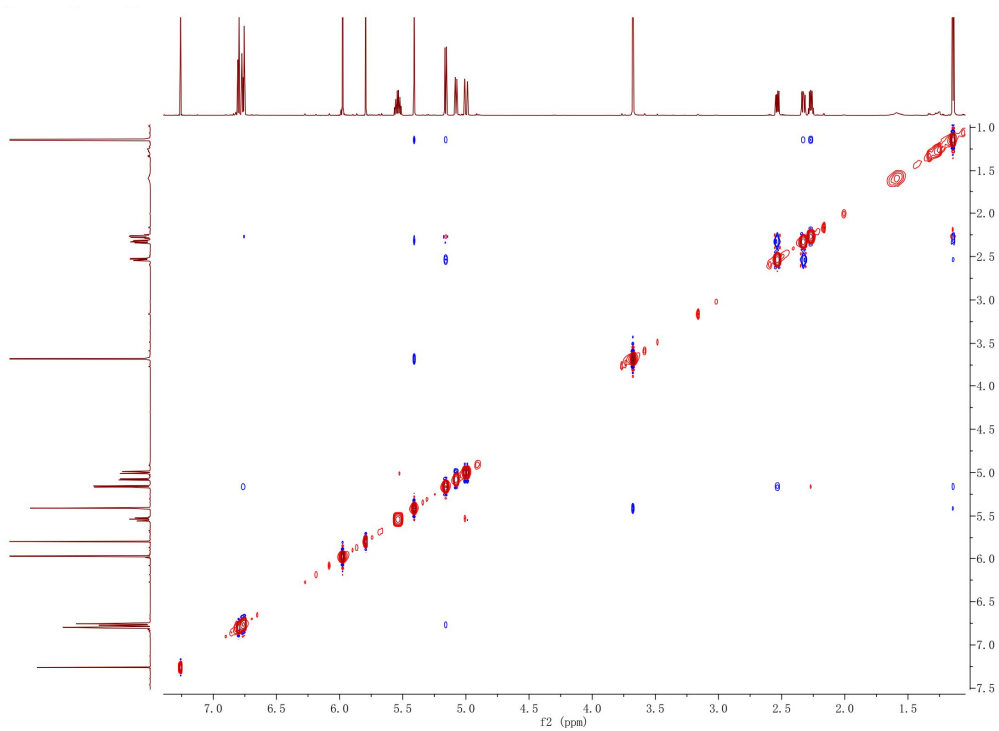

Supplement: d0ob01889a1.pdf [file d0ob01889a1.pdf]
